# Supplementary material for: Versatile metal complexes of 2,5-bis{N-(2,6-di isopropylphenyl)iminomethyl}pyrrole for epoxide–CO2 coupling and ring opening polymerization of ε-caprolactone
Source: Royal Society of Chemistry journal article supplement (doi:10.1039/c3ra44988b), 2013-12-19

## Supporting Information

### **Versatile metal complexes of 2,5-bis{N-(2,6-diisopropylphenyl) iminomethyl}pyrrole for epoxide-CO<sub>2</sub> coupling and ring opening polymerization of caprolactone**

*Heeralal Vignesh Babu and Krishnamurthi Muralidharan\**

School of Chemistry, University of Hyderabad, Hyderabad - 500046, India.

#### **Table of Contents**

|                                         |    |
|-----------------------------------------|----|
| <sup>1</sup> H NMR spectra of <b>6</b>  | S2 |
| <sup>13</sup> C NMR spectra of <b>6</b> | S3 |
| <sup>31</sup> P NMR spectra of <b>6</b> | S4 |
| HRMS spectra of <b>6</b>                | S5 |
| <sup>1</sup> H NMR spectra of <b>7</b>  | S6 |
| <sup>13</sup> C NMR spectra of <b>7</b> | S7 |
| <sup>31</sup> P NMR spectra of <b>7</b> | S8 |
| HRMS spectra of <b>7</b>                | S9 |

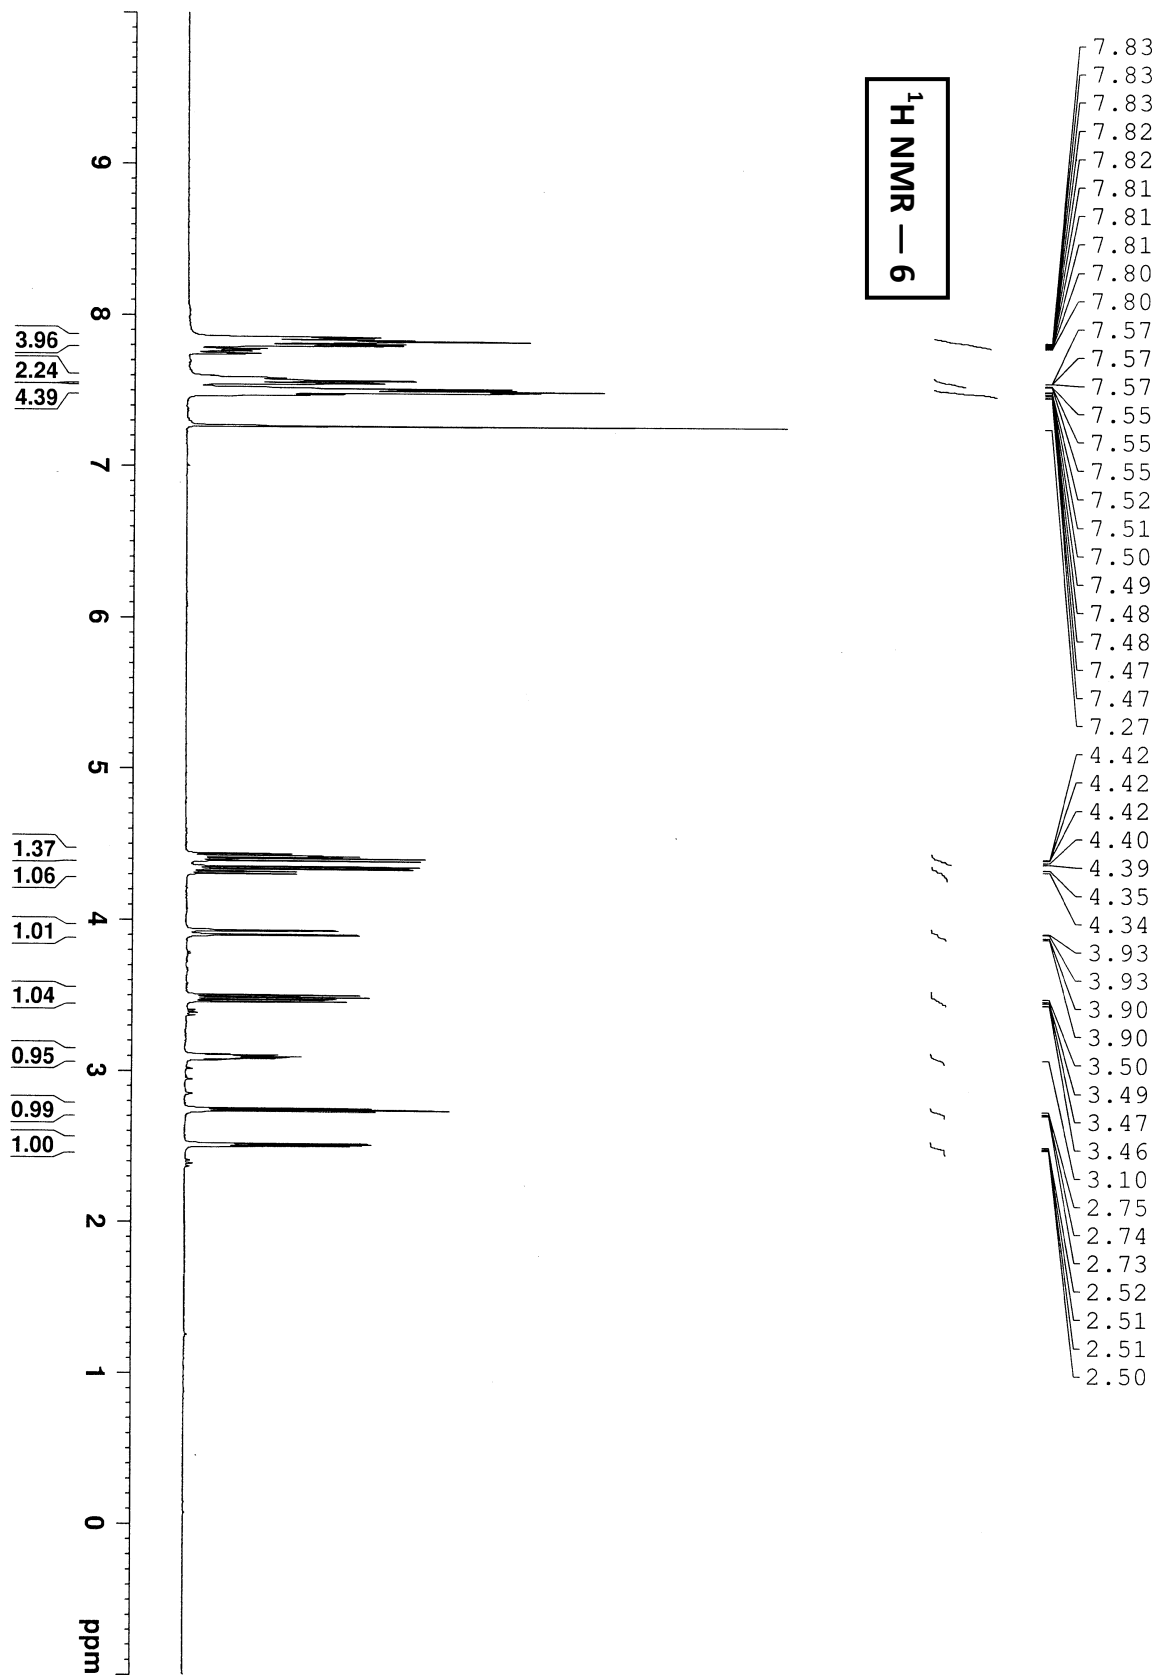

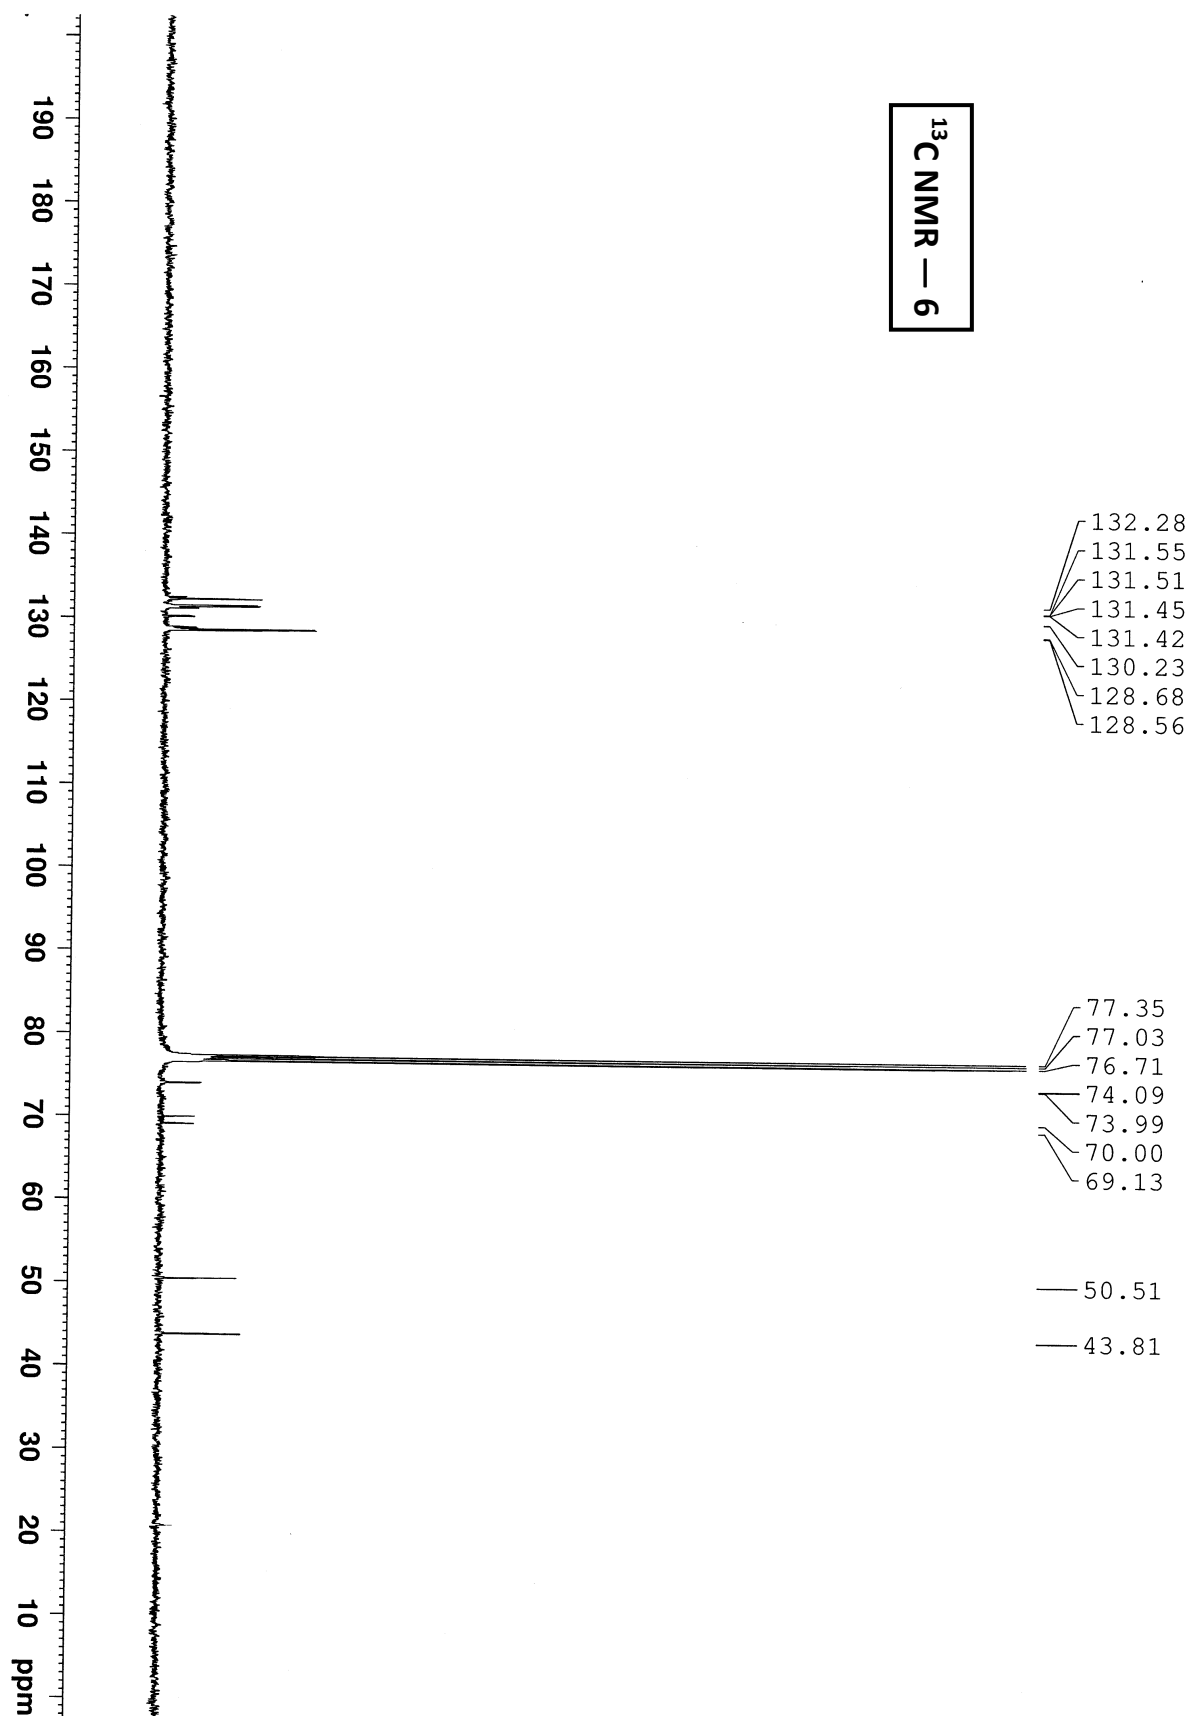

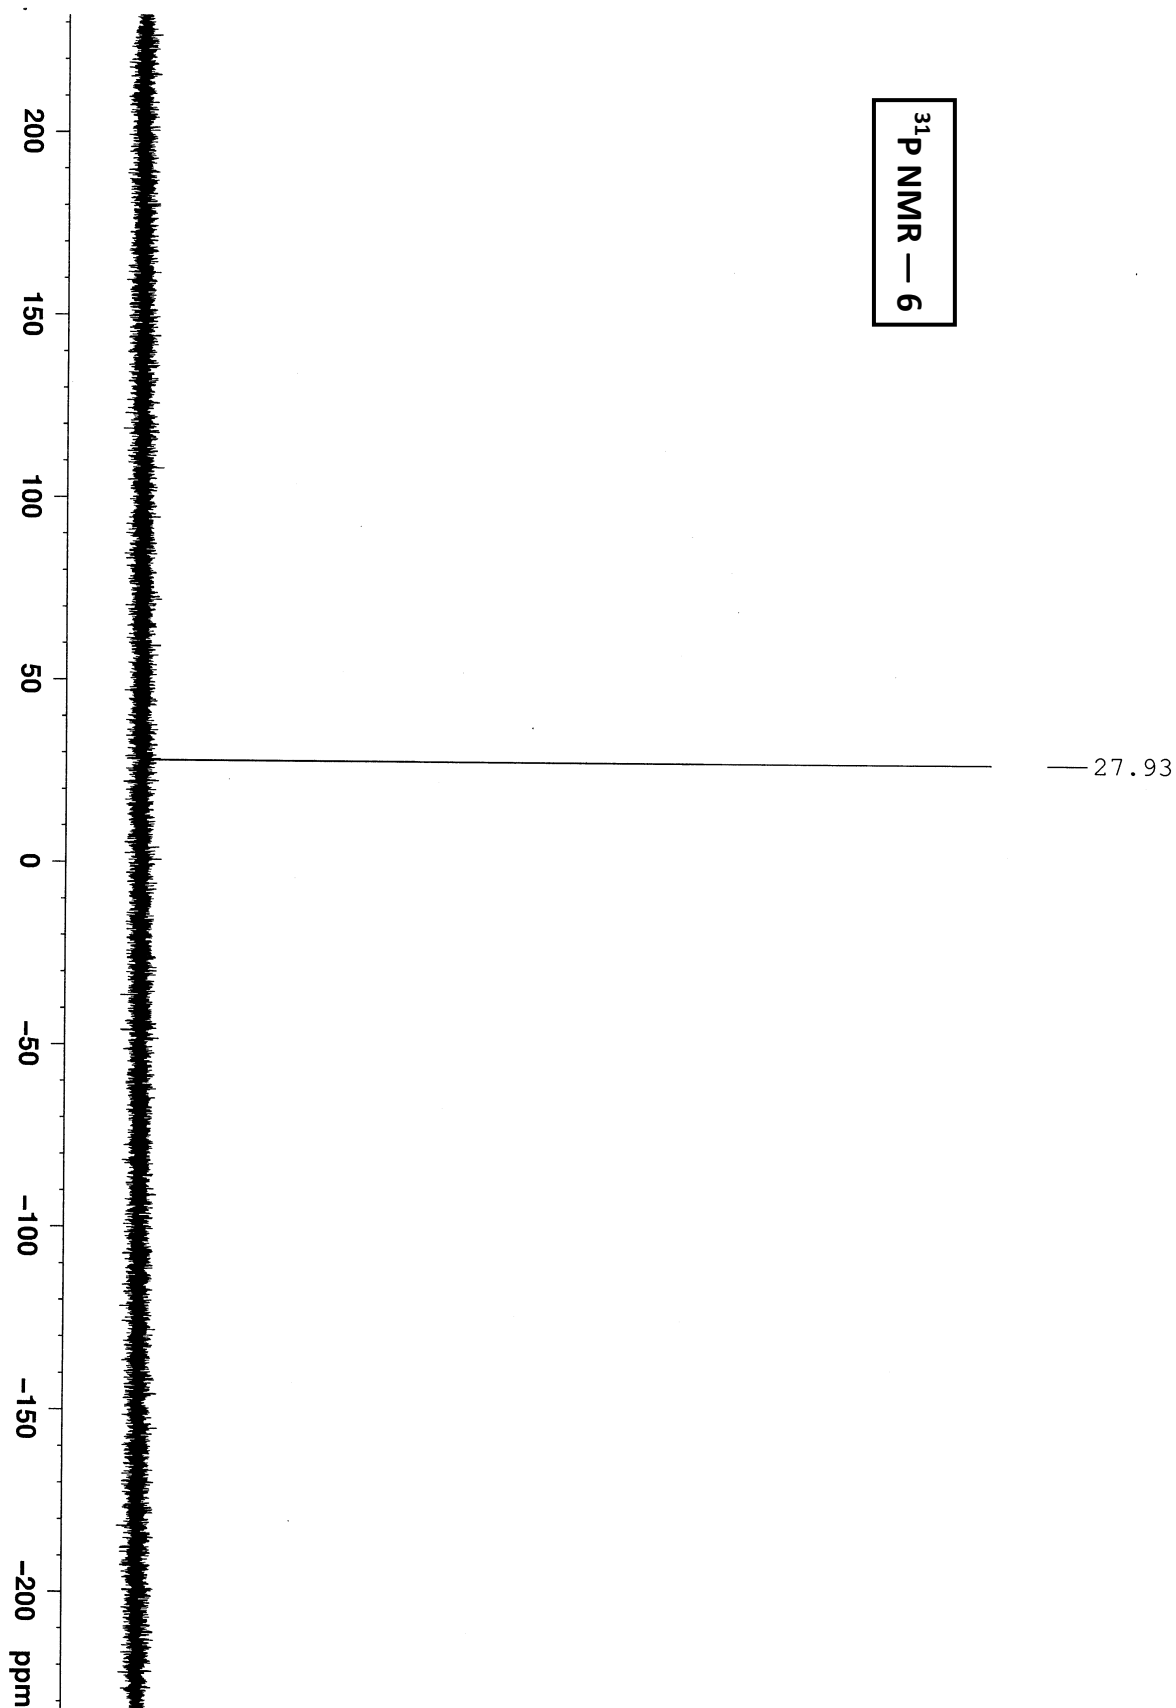

Display Report

|                      |                                               |                                       |             |
|----------------------|-----------------------------------------------|---------------------------------------|-------------|
| <b>Analysis Info</b> |                                               | Acquisition Date 7/23/2012 4:07:13 PM |             |
| Analysis Name        | D:\Data\2012\Dr.K.Muralidharan\JULY\HVB-339.d | Operator                              | UOH         |
| Method               | tune_low_Pos.m                                | Instrument                            | maXis 10138 |
| Sample Name          | HVB-339-CHCL3-ACN                             |                                       |             |
| Comment              |                                               |                                       |             |

|                              |            |                       |           |                  |           |
|------------------------------|------------|-----------------------|-----------|------------------|-----------|
| <b>Acquisition Parameter</b> |            |                       |           |                  |           |
| Source Type                  | ESI        | Ion Polarity          | Positive  | Set Nebulizer    | 0.3 Bar   |
| Focus                        | Not active | Set Capillary         | 3800 V    | Set Dry Heater   | 180 °C    |
| Scan Begin                   | 50 m/z     | Set End Plate Offset  | -500 V    | Set Dry Gas      | 4.0 l/min |
| Scan End                     | 2000 m/z   | Set Collision Cell RF | 350.0 Vpp | Set Divert Valve | Waste     |

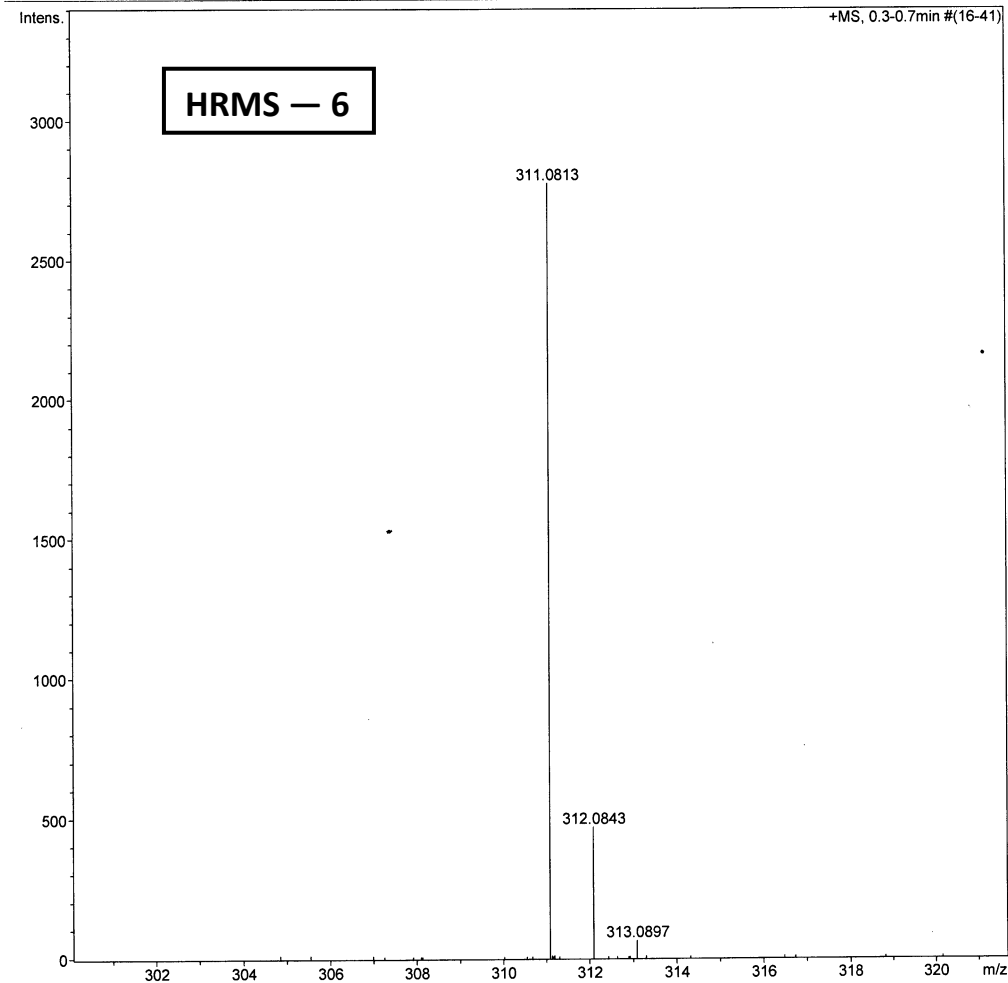

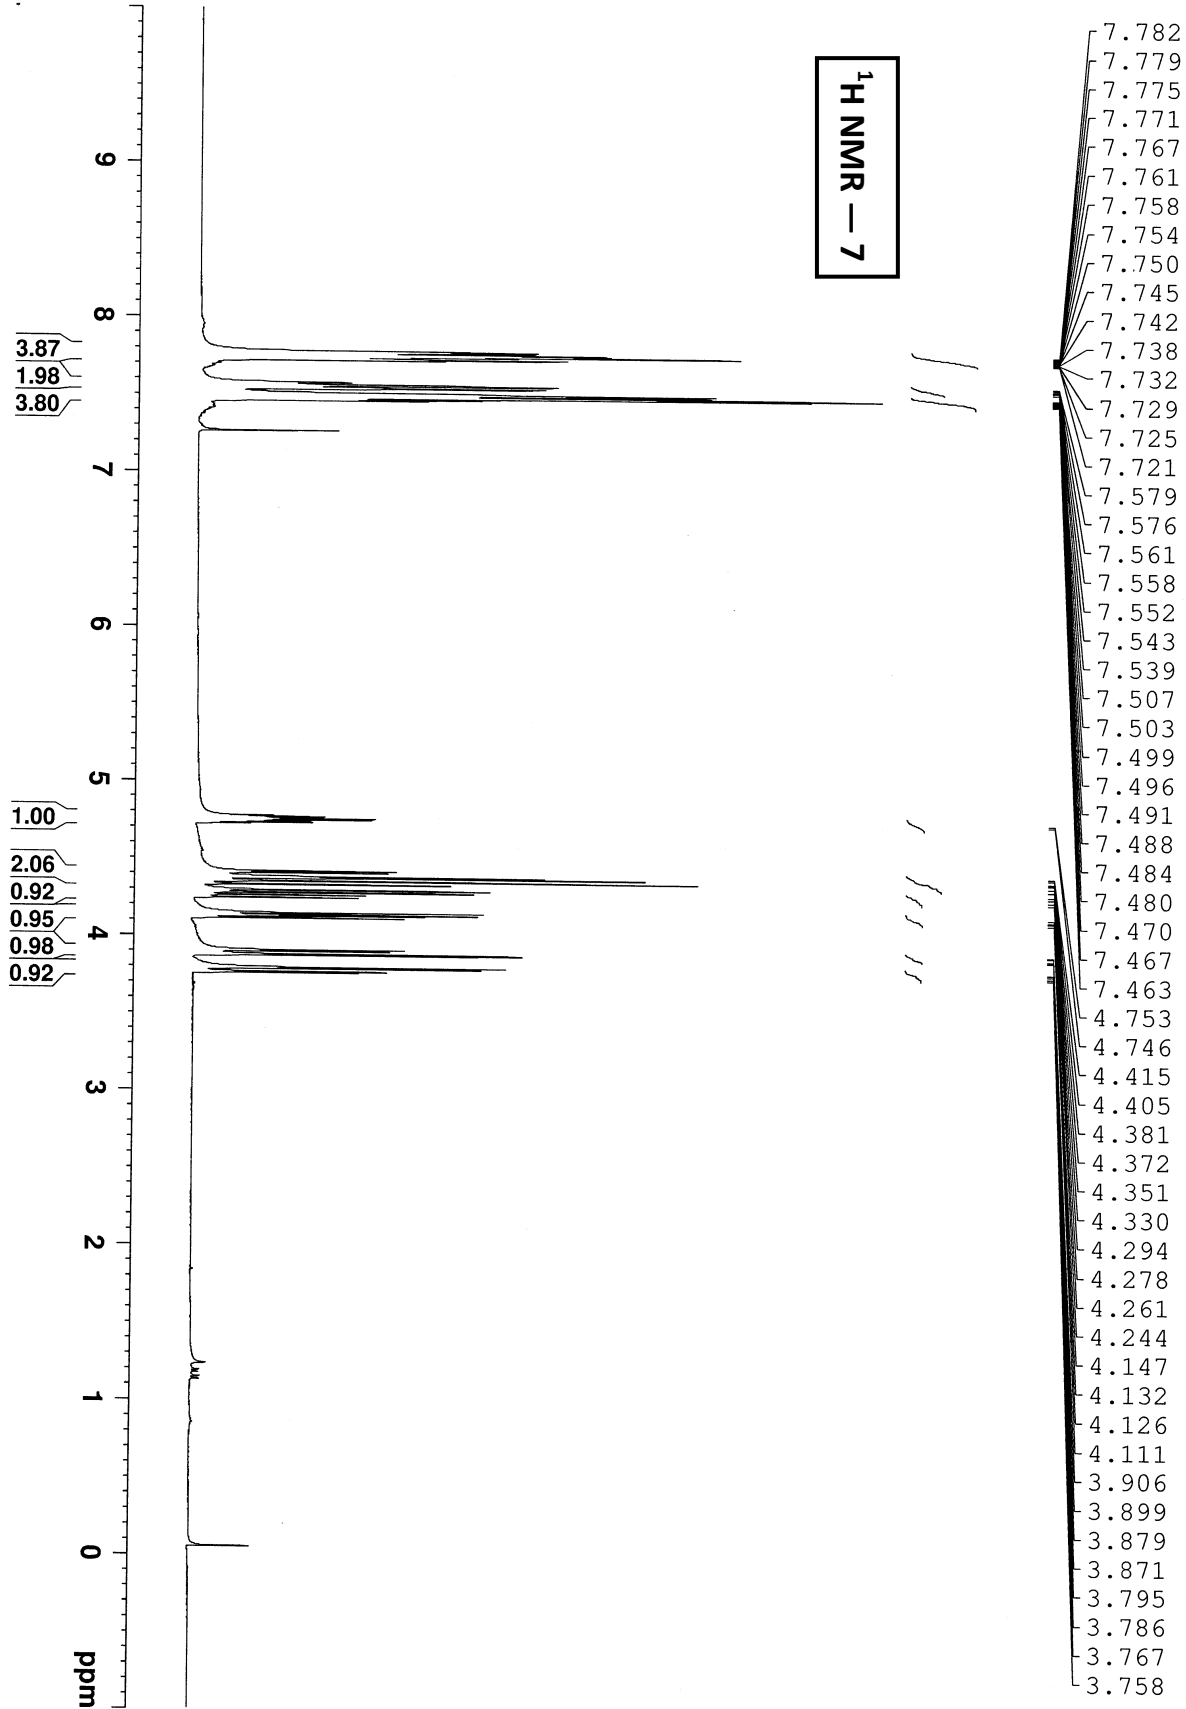

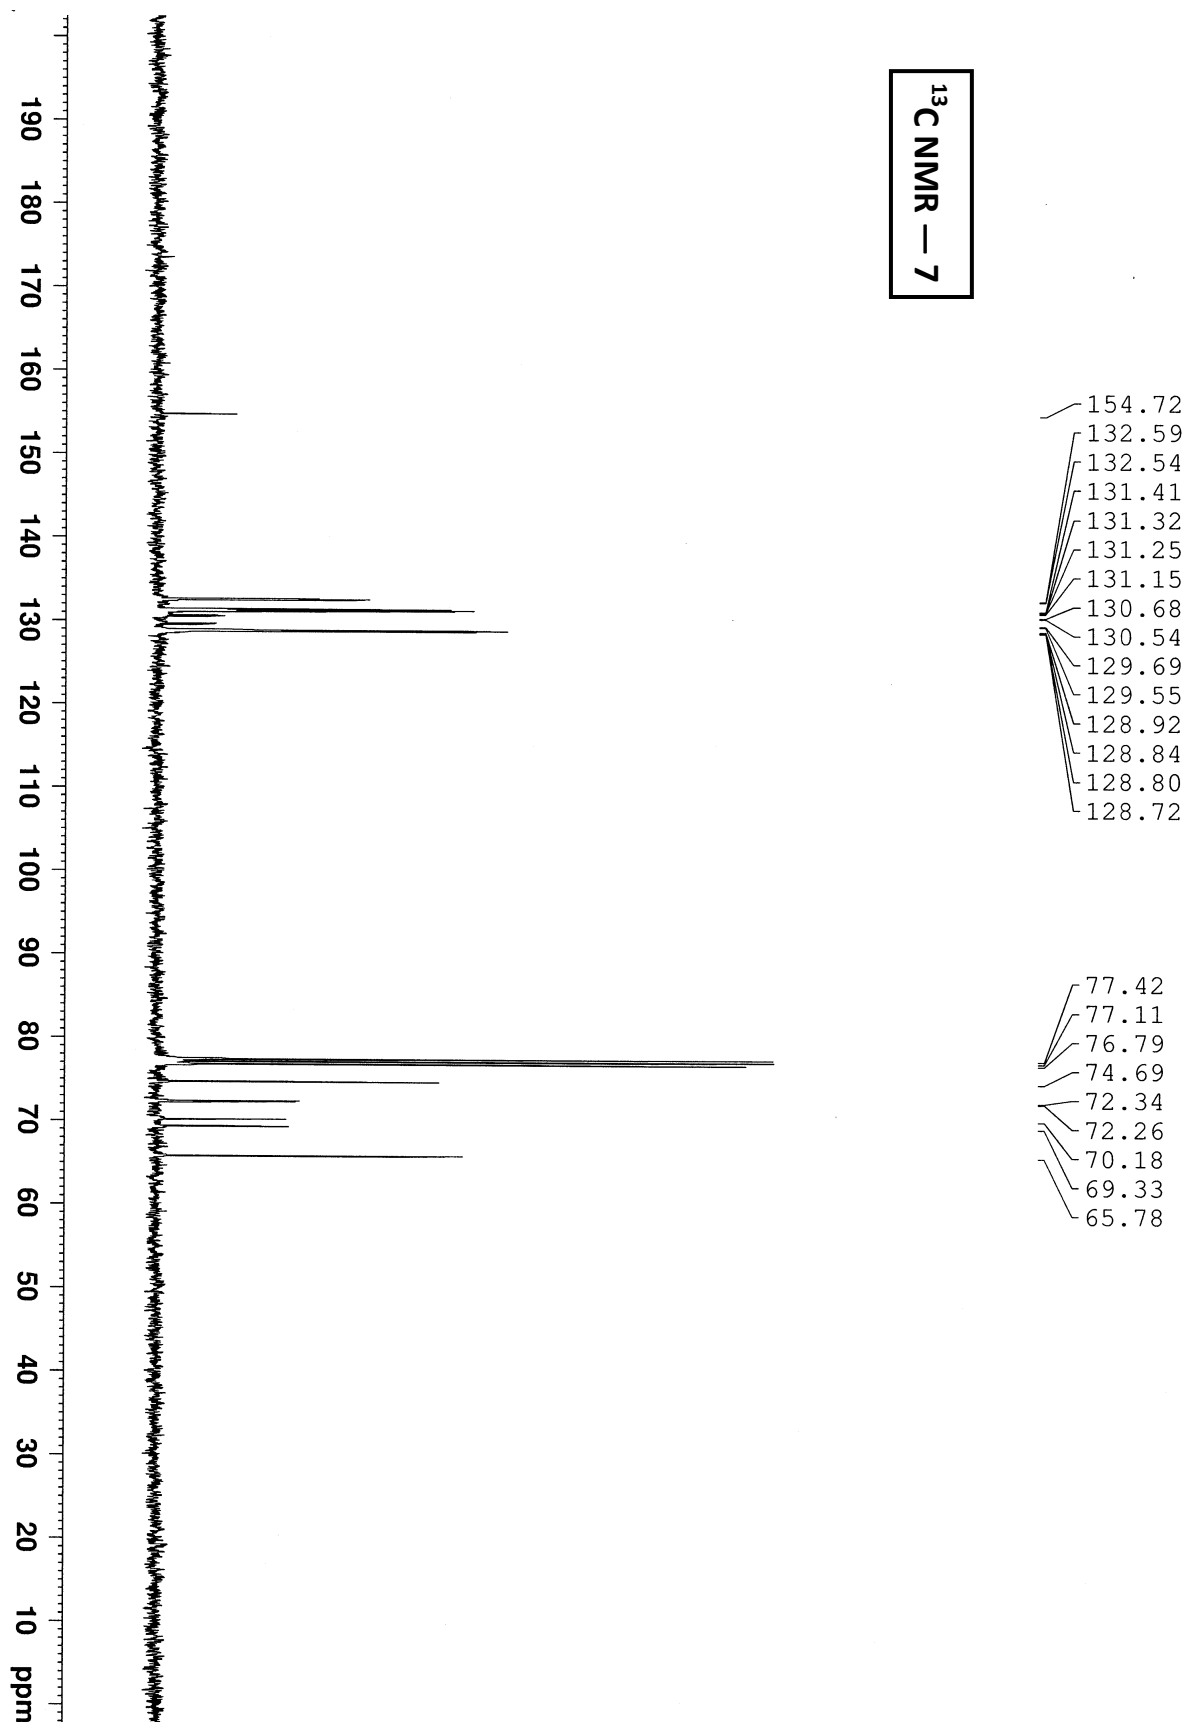

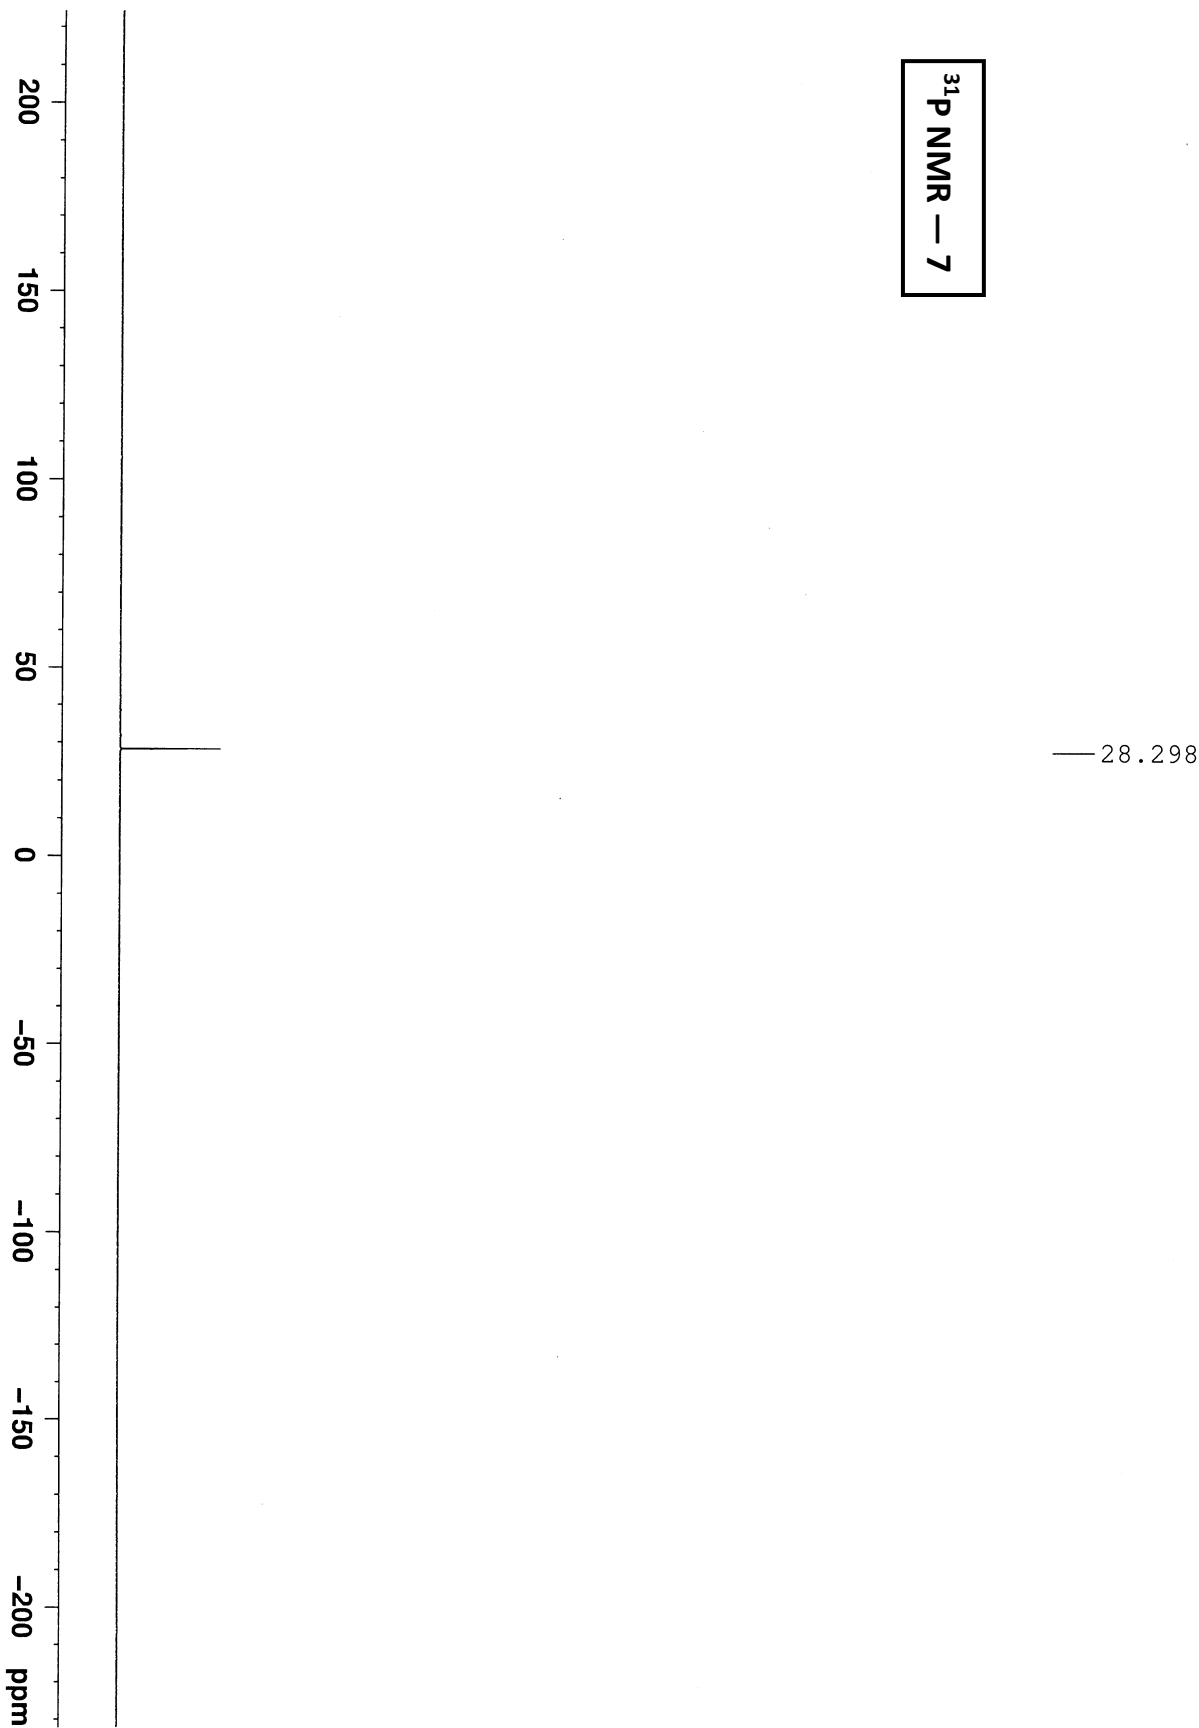



Display Report

|                              |                                               |                       |                  |                  |                      |  |
|------------------------------|-----------------------------------------------|-----------------------|------------------|------------------|----------------------|--|
| Analysis Info                |                                               |                       | Acquisition Date |                  | 7/23/2012 4:32:22 PM |  |
| Analysis Name                | D:\Data\2012\Dr.K.Muralidharan\JULY\HVB-340.d |                       |                  | Operator         | UOH                  |  |
| Method                       | tune_low_Pos-R2.m                             |                       |                  | Instrument       | maXis 10138          |  |
| Sample Name                  | HVB-340-CHCL3-ACN                             |                       |                  |                  |                      |  |
| Comment                      |                                               |                       |                  |                  |                      |  |
| <b>Acquisition Parameter</b> |                                               |                       |                  |                  |                      |  |
| Source Type                  | ESI                                           | Ion Polarity          | Positive         | Set Nebulizer    | 0.3 Bar              |  |
| Focus                        | Not active                                    | Set Capillary         | 3500 V           | Set Dry Heater   | 180 °C               |  |
| Scan Begin                   | 50 m/z                                        | Set End Plate Offset  | -500 V           | Set Dry Gas      | 4.0 l/min            |  |
| Scan End                     | 2580 m/z                                      | Set Collision Cell RF | 300.0 Vpp        | Set Divert Valve | Waste                |  |

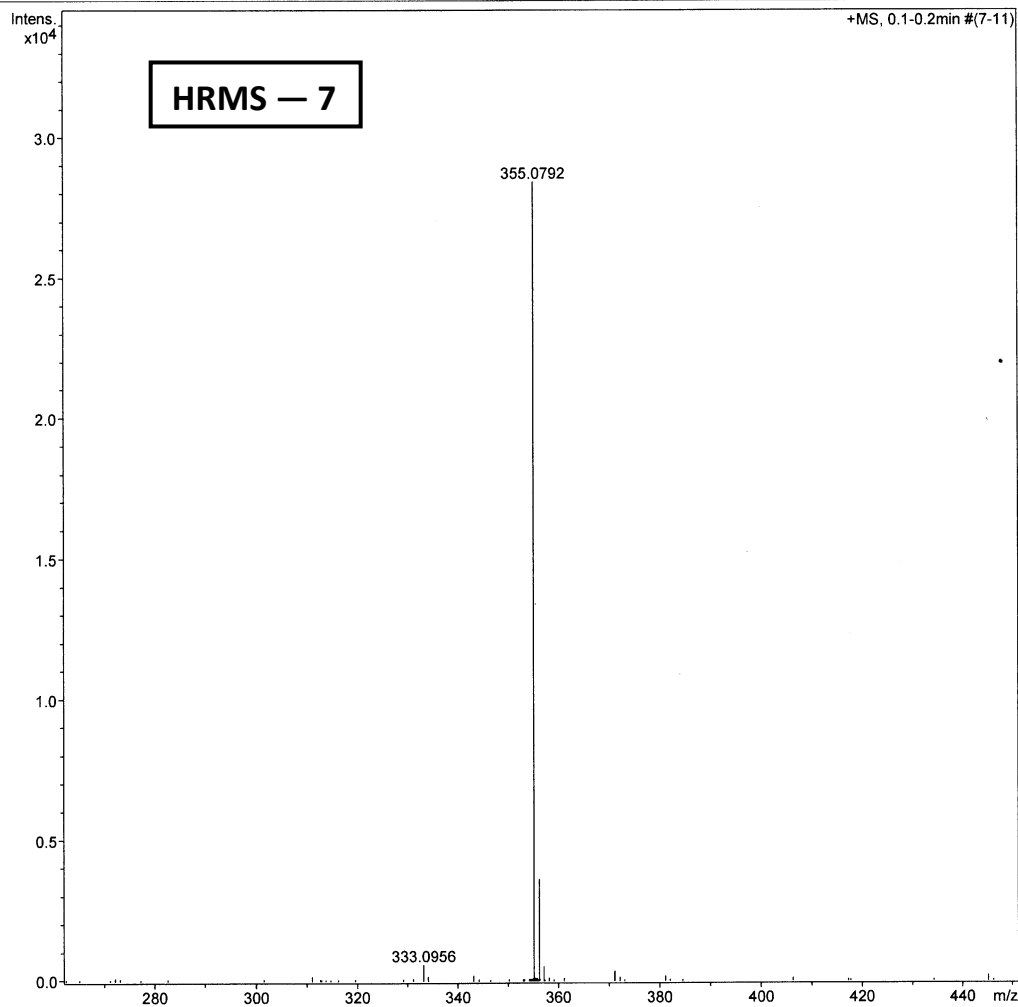

Supplement: c3ra44988b.pdf [file c3ra44988b.pdf]
